# Supplementary material
Source: PubMed Central journal article supplement (PMC10366339)
Supplement: NIHMS1861157-supplement-supinfo.pdf [file NIHMS1861157-supplement-supinfo.pdf]

Supplementary Figure 1: Sleep loss decreases plasma but increases CSF AD biomarkers. Mean overnight A $\beta$ , tau and phosphorylated tau (p-tau) concentration normalized to a baseline of the average concentrations over hours 0-12 (07:00-19:00) in cerebrospinal fluid (CSF) and plasma. Sleep deprivation increased overnight A $\beta$ <sub>40</sub>, A $\beta$ <sub>42</sub>, T181, T217, and pT181 levels by 35-65% from baseline during sleep deprivation compared with controls. In plasma, sleep deprivation decreased overnight A $\beta$ <sub>40</sub>, A $\beta$ <sub>42</sub>, T181, T217, and pT181 by 5-15% in plasma compared to participants in the control group (A-J). The overnight albumin level in CSF decreased ~20% from baseline during sleep deprivation, but in plasma was not significantly different in the sleep-deprived group compared with the control (K, L). The overnight period during the intervention night was defined as hours 18 to 28 (01:00–11:00) to account for the transit time of CSF from the brain to the lumbar catheter (shaded area). Blue: control; Red: sleep-deprived; Error bars indicate standard error. The vertical dashed line is the intervention start time. The horizontal dashed line is at 100% of baseline. P-values are shown.

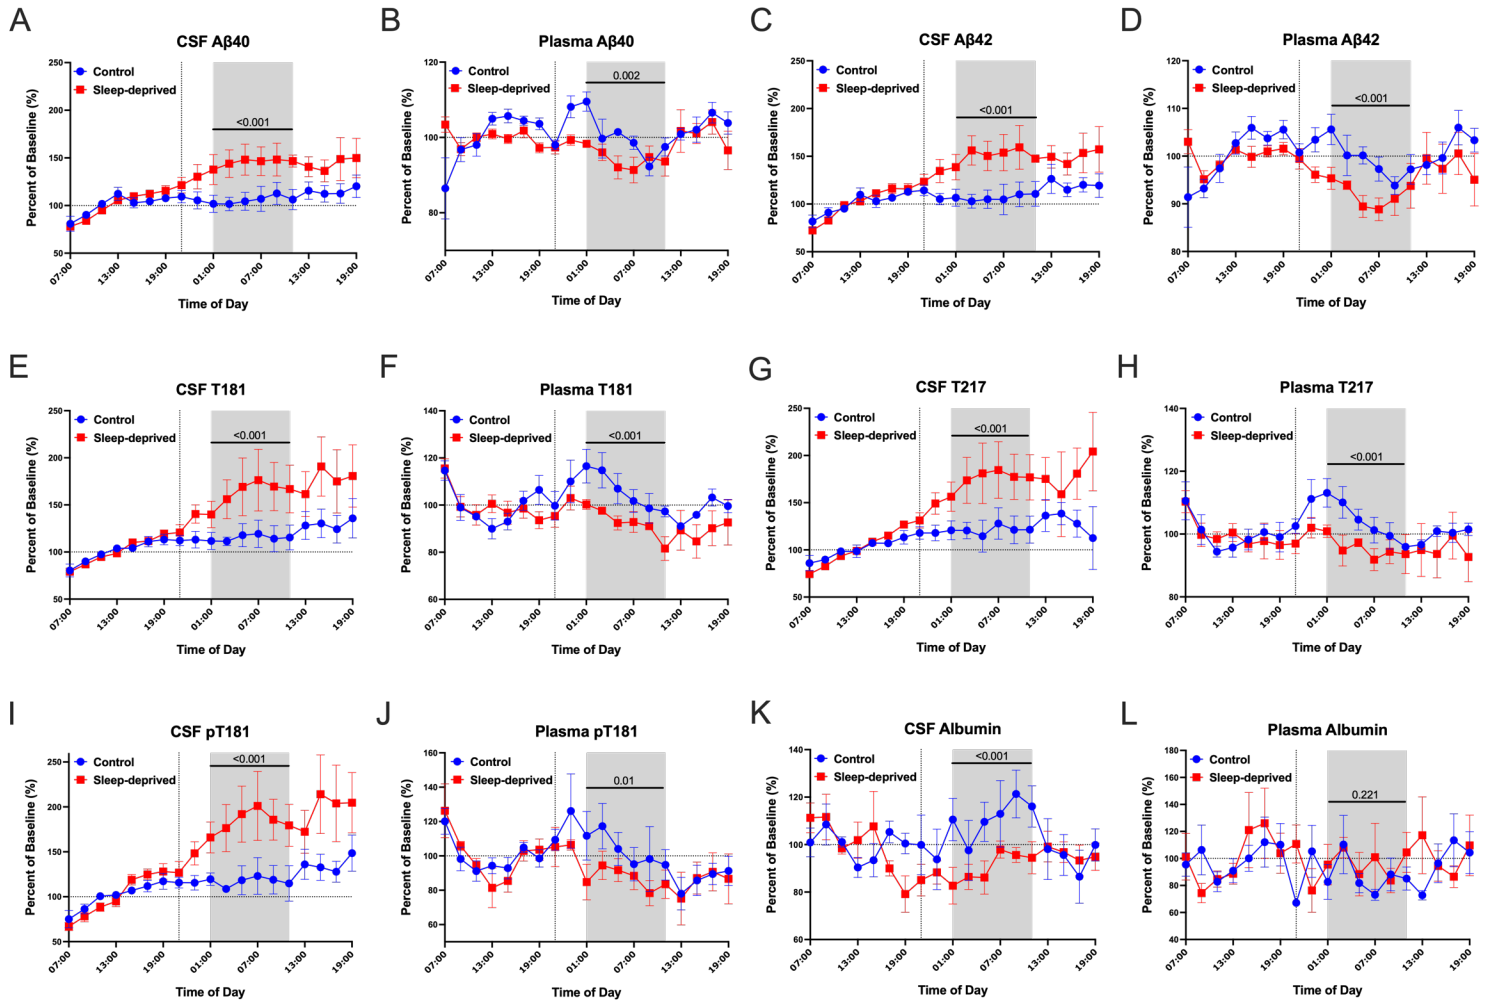

Supplementary Figure 2: Blood-CSF transport impaired by sleep loss. CSF/Plasma Protein Ratio normalized to a baseline of the average ratio over hours 0-12 (07:00-19:00). The CSF/plasma ratio increased for A $\beta$ 40, A $\beta$ 42, T181, T217, and pT181 during the overnight period in the sleep-deprived group compared with the control (A-E). The CSF/plasma albumin ratio, a marker of blood-CSF permeability, was decreased overnight during sleep deprivation (F). The overnight period during the intervention night was defined as hours 18 to 28 (01:00–11:00). Blue: control; Red: sleep-deprived; Error bars indicate standard error. The vertical dashed line is the intervention start time. The horizontal dashed line is at time 0. P-values are shown.

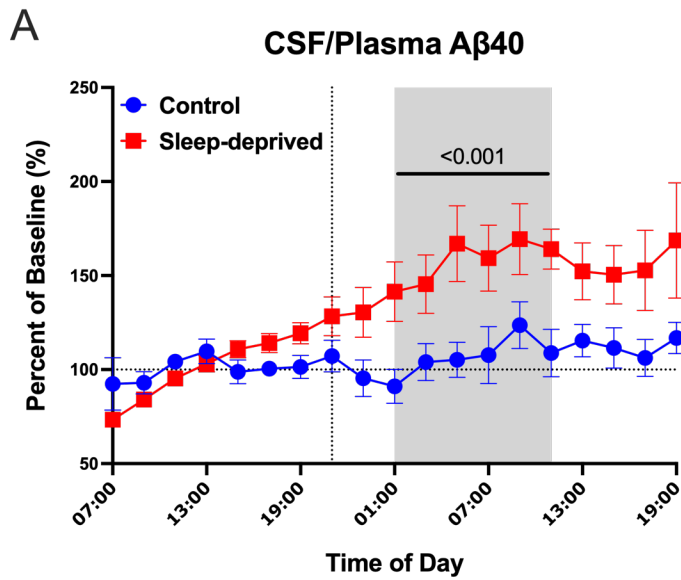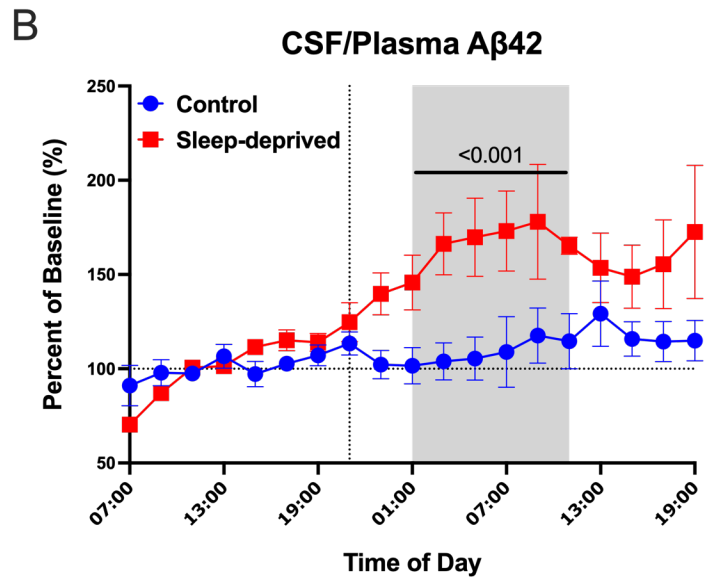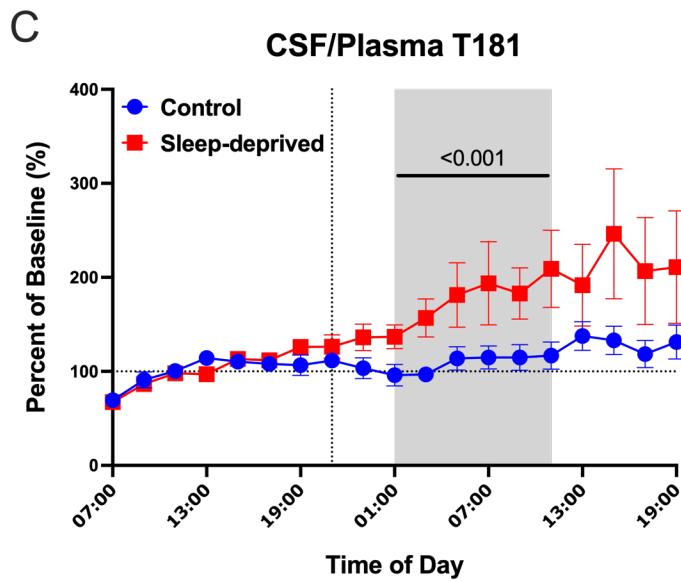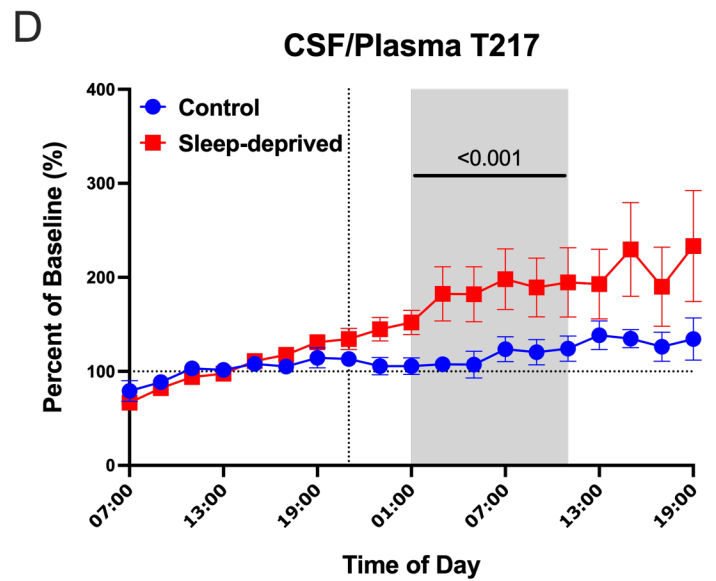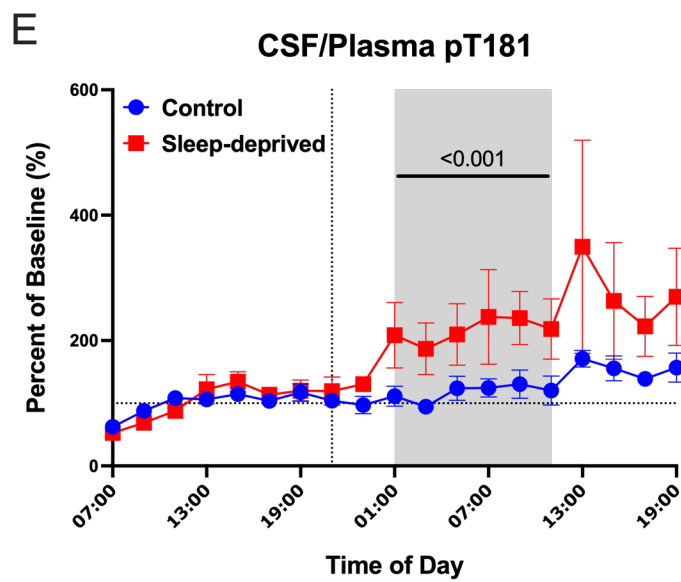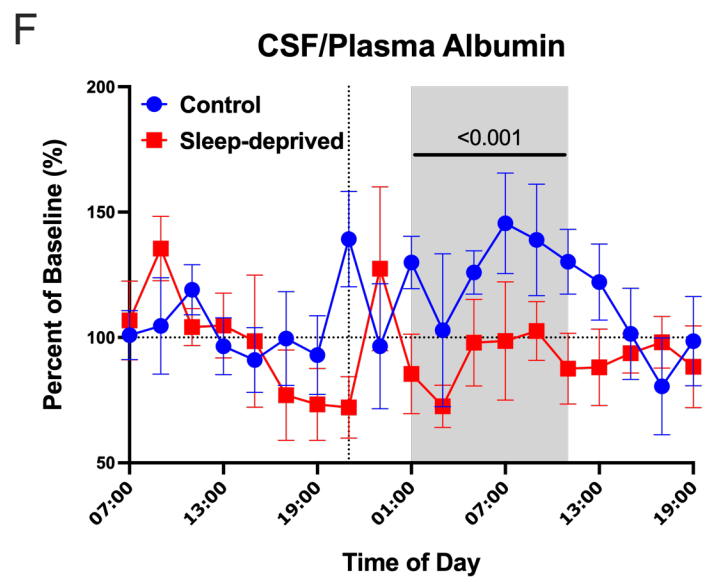

Supplementary Figure 3: No effect of sleep on Alzheimer's disease biomarker ratios. Both daytime and overnight A $\beta$ 42/40 ratios were not significantly different between the sleep-deprived and control groups in CSF, but they did differ in plasma (A, B). The CSF A $\beta$ 42/40 ratio for one participant's time course under the control condition was abnormally high compared to the same participant's time course under the sleep-deprived condition and was excluded. Although plasma A $\beta$ 42/40 ratios were higher in the control group than the sleep-deprived group, there were no evidence of an effect from sleep loss. Both day and night ratios of pT181/T181 and pT181/ A $\beta$ 42 in CSF and plasma were not significantly different between groups (C-F). The overnight period during the intervention night was defined as hours 18 to 28 (01:00–11:00) (Shaded area). The day period was defined as 09:00 – 19:00. Blue: control; Red: sleep-deprived; Error bars indicate standard error. The vertical dashed line is the intervention start time. P-values are shown.

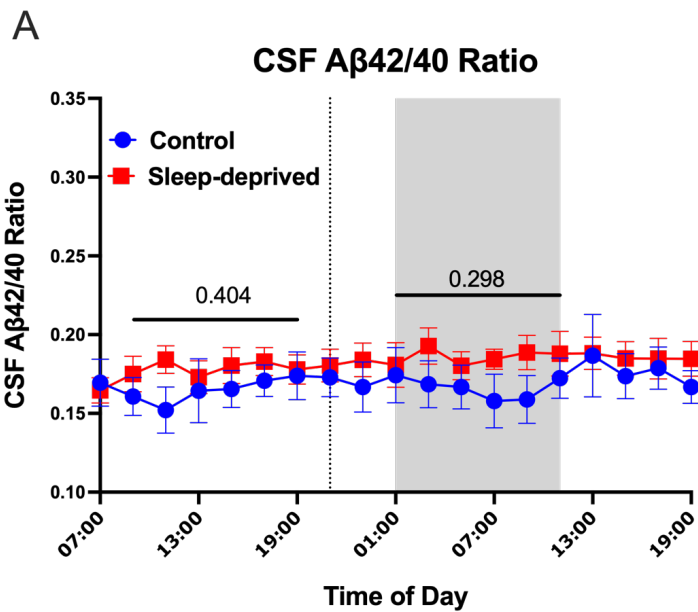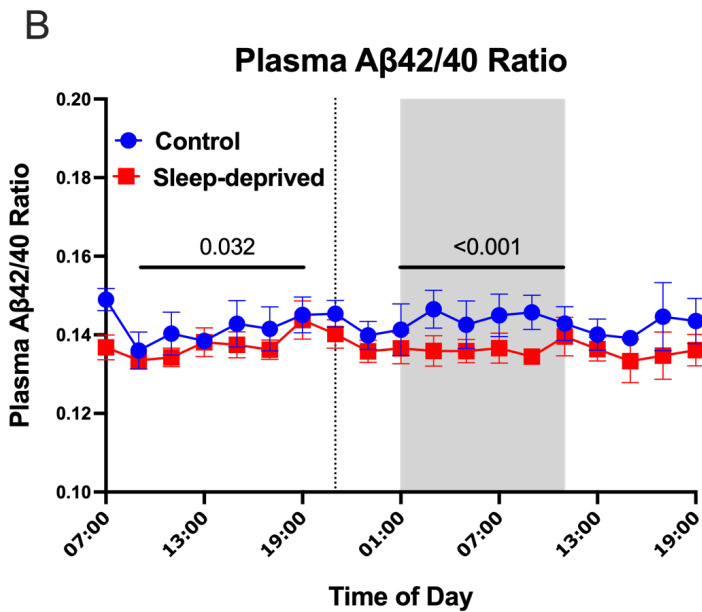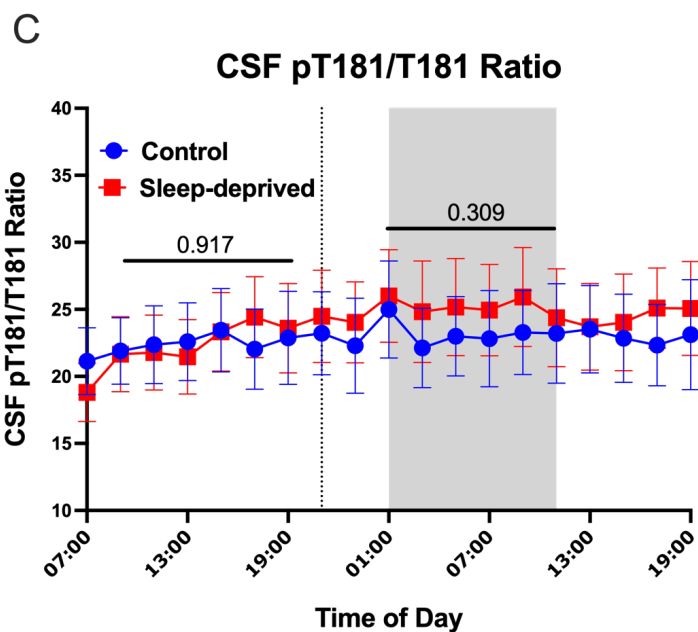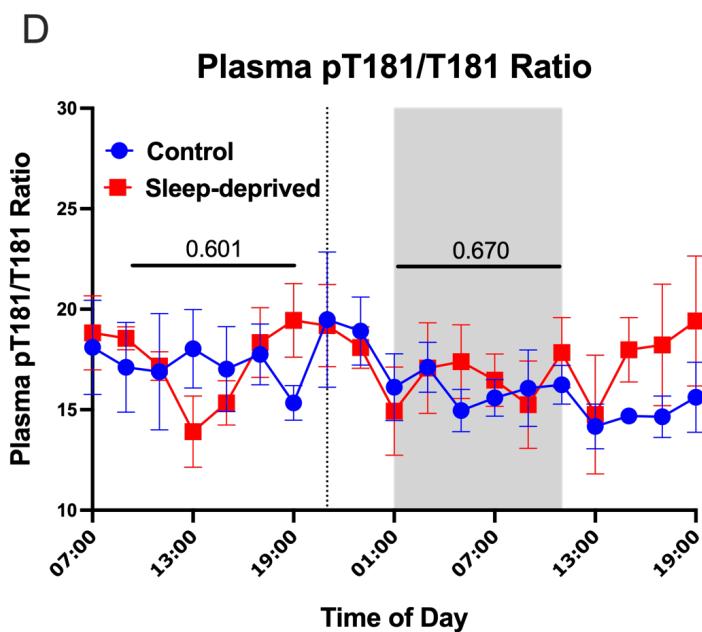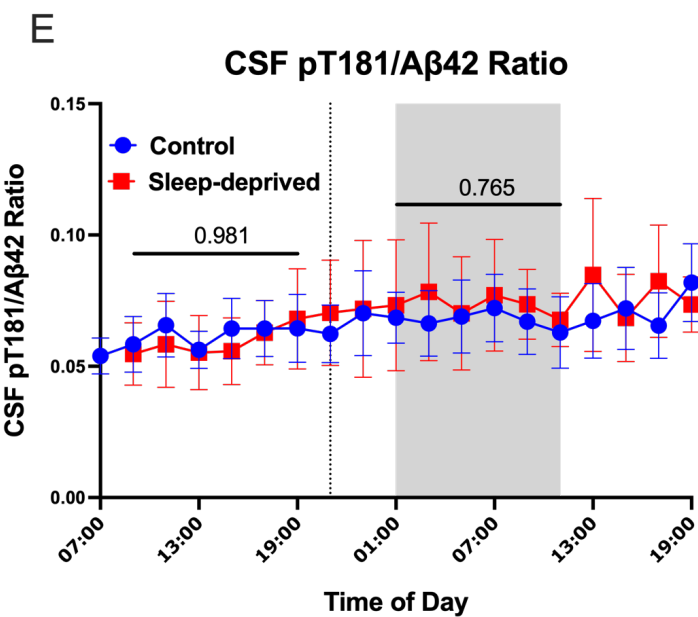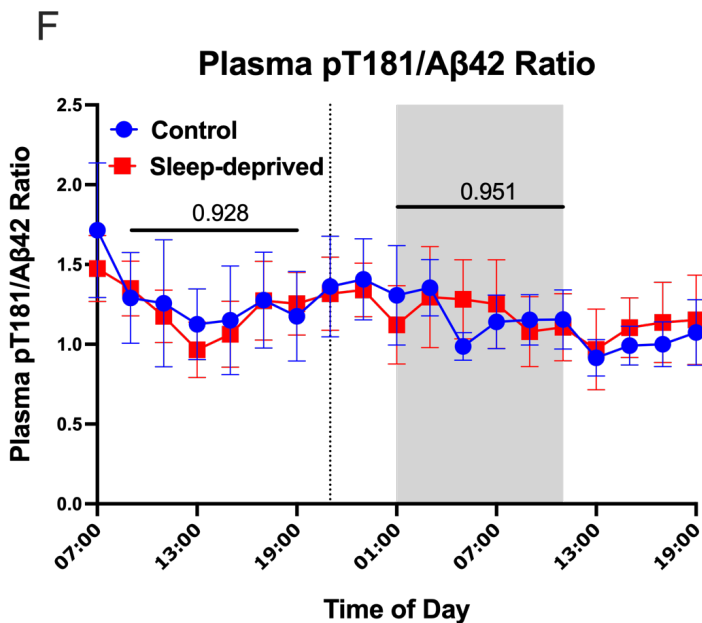

Supplementary Table 1: Mixed Model Results for Differences in Daytime (09:00 – 19:00) CSF and Plasma Alzheimer Disease Biomarker Ratios: A $\beta$ 42/40, pT181/T181, and pT181/A $\beta$ 42

| CSF and Plasma AD Biomarker Ratios |                     |                            |                             |              |       |
|------------------------------------|---------------------|----------------------------|-----------------------------|--------------|-------|
| Biomarker Ratio                    | Factor              | Pairwise Comparison        | Mean Difference (95% CI)    | F (df)       | p     |
| CSF A $\beta$ 42/40                | Intervention        | Sleep-deprived vs. Control | +0.014<br>(-0.024, 0.052)   | 0.789 (1,7)  | 0.404 |
|                                    | Time of day         |                            |                             | 1.843 (5,35) | 0.130 |
|                                    | Intervention x time |                            |                             | 2.560 (5,35) | 0.045 |
| Plasma A $\beta$ 42/40             | Intervention        | Sleep-deprived vs. Control | -0.003<br>(-0.007, -0.0003) | 4.88 (1,44)  | 0.032 |
|                                    | Time of day         |                            |                             | 2.84 (5,44)  | 0.026 |
|                                    | Intervention x time |                            |                             | 0.40 (5,44)  | 0.847 |
| CSF pT181/T181                     | Intervention        | Sleep-deprived vs. Control | +0.173<br>(-3.141, 3.488)   | 0.01 (1,44)  | 0.917 |
|                                    | Time of day         |                            |                             | 0.13 (5,44)  | 0.984 |
|                                    | Intervention x time |                            |                             | 0.10 (5,44)  | 0.993 |
| Plasma pT181/T181                  | Intervention        | Sleep-deprived vs. Control | +0.360<br>(-1.018, 1.739)   | 0.28 (1,43)  | 0.601 |
|                                    | Time of day         |                            |                             | 0.70 (5,43)  | 0.624 |
|                                    | Intervention x time |                            |                             | 1.97 (5,43)  | 0.103 |
| CSF pT181/ A $\beta$ 42            | Intervention        | Sleep-deprived vs. Control | -0.0005<br>(-0.044, 0.043)  | 0.001 (1,8)  | 0.981 |
|                                    | Time of day         |                            |                             | 2.579 (5,40) | 0.041 |
|                                    | Intervention x time |                            |                             | 1.015 (5,40) | 0.422 |
| Plasma pT181/ A $\beta$ 42         | Intervention        | Sleep-deprived vs. Control | -0.033<br>(-0.841, 0.775)   | 0.009 (1,8)  | 0.928 |
|                                    | Time of day         |                            |                             | 3.228 (5,40) | 0.015 |
|                                    | Intervention x time |                            |                             | 0.656 (5,40) | 0.659 |

CSF = cerebrospinal fluid; A $\beta$  = amyloid- $\beta$ ; T181 = unphosphorylated tau-181; T217 = unphosphorylated tau-217; pT181 = phosphorylated tau-181; CI = confidence intervals; df = degrees of freedom

Supplementary Table 2: Mixed Model Results for Differences in Overnight (21:00 – 11:00) CSF and Plasma Alzheimer Disease Biomarker Ratios: A $\beta$ 42/40, pT181/T181, and pT181/A $\beta$ 42

| CSF and Plasma AD Biomarker Ratios |                     |                            |                            |                 |        |
|------------------------------------|---------------------|----------------------------|----------------------------|-----------------|--------|
| Biomarker Ratio                    | Factor              | Pairwise Comparison        | Mean Difference (95% CI)   | F (df)          | p      |
| CSF A $\beta$ 42/40                | Intervention        | Sleep-deprived vs. Control | +0.011<br>(0.002, 0.021)   | 5.54 (1,52.00)  | 0.022  |
|                                    | Time of day         |                            |                            | 0.219 (7,50.92) | 0.979  |
|                                    | Intervention x time |                            |                            | 0.450 (7,50.92) | 0.866  |
| Plasma A $\beta$ 42/40             | Intervention        | Sleep-deprived vs. Control | -0.007<br>(-0.009, -0.004) | 32.34 (1,60.00) | <0.001 |
|                                    | Time of day         |                            |                            | 0.862 (7,60.00) | 0.542  |
|                                    | Intervention x time |                            |                            | 0.801 (7,60.00) | 0.590  |
| CSF pT181/T181                     | Intervention        | Sleep-deprived vs. Control | +1.857<br>(-1.407, 5.121)  | 1.30 (1,60.00)  | 0.260  |
|                                    | Time of day         |                            |                            | 0.098 (7,60.00) | 0.998  |
|                                    | Intervention x time |                            |                            | 0.021 (7,60.00) | 0.999  |
| Plasma pT181/T181                  | Intervention        | Sleep-deprived vs. Control | +0.070<br>(-1.274, 1.414)  | 0.011 (1,58.99) | 0.917  |
|                                    | Time of day         |                            |                            | 2.04 (7,58.99)  | 0.065  |
|                                    | Intervention x time |                            |                            | 0.308 (7,58.99) | 0.948  |
| CSF pT181/ A $\beta$ 42            | Intervention        | Sleep-deprived vs. Control | +0.007<br>(-0.008, 0.022)  | 0.884 (1,59.05) | 0.351  |
|                                    | Time of day         |                            |                            | 0.067 (7,59.05) | 0.999  |
|                                    | Intervention x time |                            |                            | 0.085 (7,59.05) | 0.999  |
| Plasma pT181/ A $\beta$ 42         | Intervention        | Sleep-deprived vs. Control | -0.033<br>(-0.141, 0.074)  | 0.390 (1,59.00) | 0.535  |
|                                    | Time of day         |                            |                            | 1.64 (7,59.00)  | 0.143  |
|                                    | Intervention x time |                            |                            | 0.405 (7,59.00) | 0.896  |

CSF = cerebrospinal fluid; A $\beta$  = amyloid- $\beta$ ; T181 = unphosphorylated tau-181; T217 = unphosphorylated tau-217; pT181 = phosphorylated tau-181; CI = confidence intervals; df = degrees of freedom



Supplementary Table 3: Mixed Model Results for Change in Overnight (01:00–11:00) CSF and Plasma A $\beta$ , Tau, Phosphorylated Tau, and Albumin from Baseline

| CSF                      |                     |                            |                            |                 |        |
|--------------------------|---------------------|----------------------------|----------------------------|-----------------|--------|
| Biomarker                | Factor              | Pairwise Comparison        | Mean Difference (95% CI)   | F (df)          | p      |
| A $\beta$ 40, % baseline | Intervention        | Sleep-deprived vs. Control | +38.631 (27.368, 49.894)   | 47.84 (1,42.99) | <0.001 |
|                          | Time of day         |                            |                            | 0.302 (5,42.99) | 0.909  |
|                          | Intervention x time |                            |                            | 0.077 (5,42.99) | 0.995  |
| A $\beta$ 42, % baseline | Intervention        | Sleep-deprived vs. Control | +43.324 (29.949, 56.698)   | 42.68 (1,43)    | <0.001 |
|                          | Time of day         |                            |                            | 0.249 (5,43)    | 0.938  |
|                          | Intervention x time |                            |                            | 0.333 (5,43)    | 0.890  |
| T181, % baseline         | Intervention        | Sleep-deprived vs. Control | +48.022 (32.875, 63.168)   | 40.83 (1,44)    | <0.001 |
|                          | Time of day         |                            |                            | 0.740 (5,44)    | 0.598  |
|                          | Intervention x time |                            |                            | 0.334 (5,44)    | 0.890  |
| T217, % baseline         | Intervention        | Sleep-deprived vs. Control | +53.910 (41.102, 66.718)   | 71.96 (1,44)    | <0.001 |
|                          | Time of day         |                            |                            | 0.534 (5,44)    | 0.750  |
|                          | Intervention x time |                            |                            | 0.421 (5,44)    | 0.832  |
| pT181, % baseline        | Intervention        | Sleep-deprived vs. Control | +66.185 (48.835, 83.535)   | 59.10 (1,44)    | <0.001 |
|                          | Time of day         |                            |                            | 0.529 (5,44)    | 0.753  |
|                          | Intervention x time |                            |                            | 0.264 (5,44)    | 0.930  |
| Albumin, % baseline      | Intervention        | Sleep-deprived vs. Control | -20.796 (-30.298, -11.295) | 19.6 (1,44)     | <0.001 |
|                          | Time of day         |                            |                            | 1.22 (5,44)     | 0.315  |
|                          | Intervention x time |                            |                            | 0.311 (5,44)    | 0.903  |
| Plasma                   |                     |                            |                            |                 |        |
| Biomarker                | Factor              | Pairwise Comparison        | Mean Difference (95% CI)   | F (df)          | p      |
| A $\beta$ 40, % baseline | Intervention        | Sleep-deprived vs. Control | -5.48 (-8.898, -2.062)     | 10.44 (1,44)    | 0.002  |
|                          | Time of day         |                            |                            | 3.1 (5, 44)     | 0.018  |
|                          | Intervention x time |                            |                            | 1.4 (5,44)      | 0.243  |
| A $\beta$ 42, % baseline | Intervention        | Sleep-deprived vs. Control | -6.980 (-10.394, -3.566)   | 16.98 (1,44)    | <0.001 |
|                          | Time of day         |                            |                            | 1.99 (5,44)     | 0.099  |
|                          | Intervention x time |                            |                            | 0.67 (5,44)     | 0.649  |
| T181, % baseline         | Intervention        | Sleep-deprived vs. Control | -13.31 (-18.717, -7.899)   | 24.62 (1,43.13) | <0.001 |
|                          | Time of day         |                            |                            | 4.76 (5,43.12)  | 0.001  |
|                          | Intervention x time |                            |                            | 0.387 (5,43.12) | 0.855  |
| T217, % baseline         | Intervention        | Sleep-deprived vs. Control | -8.604 (-13.058, -4.151)   | 15.16 (1,44)    | <0.001 |
|                          | Time of day         |                            |                            | 2.84 (5,44)     | 0.026  |
|                          | Intervention x time |                            |                            | 0.766 (5,44)    | 0.579  |
| pT181, % baseline        | Intervention        | Sleep-deprived vs. Control | -16.694 (-29.186, -4.203)  | 7.26 (1,43.23)  | 0.010  |
|                          | Time of day         |                            |                            | 0.80 (5, 43.22) | 0.555  |
|                          | Intervention x time |                            |                            | 0.26 (5,43.22)  | 0.931  |
| Albumin, % baseline      | Intervention        | Sleep-deprived vs. Control | +9.431 (-5.882, 24.743)    | 1.54 (1,42.29)  | 0.221  |
|                          | Time of day         |                            |                            | 1.04 (5,42.11)  | 0.407  |
|                          | Intervention x time |                            |                            | 0.435 (5,42.11) | 0.822  |

CSF = cerebrospinal fluid; A $\beta$  = amyloid- $\beta$ ; T181 = unphosphorylated tau-181; T217 = unphosphorylated tau-217; pT181 = phosphorylated tau-181; CI = confidence intervals; df = degrees of freedom

Supplementary Table 4: Mixed Model Results for Change in Overnight (01:00 – 11:00) CSF/Plasma Ratios of A $\beta$ , Tau, Phosphorylated Tau, and Albumin from Baseline

| CSF/Plasma Ratios        |                     |                            |                               |              |        |
|--------------------------|---------------------|----------------------------|-------------------------------|--------------|--------|
| Biomarker                | Factor              | Pairwise Comparison        | Mean Difference (95% CI)      | F (df)       | p      |
| A $\beta$ 40, % baseline | Intervention        | Sleep-deprived vs. Control | +50.012<br>(36.718, 63.306)   | 57.56 (1,43) | <0.001 |
|                          | Time of day         |                            |                               | 1.67 (5,43)  | 0.163  |
|                          | Intervention x time |                            |                               | 0.18 (5,43)  | 0.968  |
| A $\beta$ 42, % baseline | Intervention        | Sleep-deprived vs. Control | +56.592<br>(40.012, 73.173)   | 47.38 (1,43) | <0.001 |
|                          | Time of day         |                            |                               | 0.63 (5,43)  | 0.676  |
|                          | Intervention x time |                            |                               | 0.23 (5,43)  | 0.948  |
| T181, % baseline         | Intervention        | Sleep-deprived vs. Control | +69.414<br>(47.421, 91.408)   | 40.51 (1,43) | <0.001 |
|                          | Time of day         |                            |                               | 1.75 (5,43)  | 0.145  |
|                          | Intervention x time |                            |                               | 0.45 (5,43)  | 0.811  |
| T217, % baseline         | Intervention        | Sleep-deprived vs. Control | +68.367<br>(51.409, 85.325)   | 66.02 (1,44) | <0.001 |
|                          | Time of day         |                            |                               | 1.37 (5,44)  | 0.254  |
|                          | Intervention x time |                            |                               | 0.28 (5,44)  | 0.920  |
| pT181, % baseline        | Intervention        | Sleep-deprived vs. Control | +100.695<br>(61.755, 139.636) | 27.20 (1,43) | <0.001 |
|                          | Time of day         |                            |                               | 0.45 (5,43)  | 0.810  |
|                          | Intervention x time |                            |                               | 0.03 (5,43)  | 0.999  |
| Albumin, % baseline      | Intervention        | Sleep-deprived vs. Control | -37.858<br>(-57.544, -18.172) | 15.05 (1,42) | <0.001 |
|                          | Time of day         |                            |                               | 1.10 (5,42)  | 0.377  |
|                          | Intervention x time |                            |                               | 0.11 (5,42)  | 0.991  |

CSF = cerebrospinal fluid; A $\beta$  = amyloid- $\beta$ ; T181 = unphosphorylated tau-181; T217 = unphosphorylated tau-217; pT181 = phosphorylated tau-181; CI = confidence intervals; df = degrees of freedom

Supplementary Table 5: Mixed Model Results for Differences in Overnight (01:00 – 11:00) CSF and Plasma Alzheimer Disease Biomarker Ratios: A $\beta$ 42/40, pT181/T181, and pT181/A $\beta$ 42

| CSF and Plasma AD Biomarker Ratios |                     |                            |                            |              |        |
|------------------------------------|---------------------|----------------------------|----------------------------|--------------|--------|
| Biomarker Ratio                    | Factor              | Pairwise Comparison        | Mean Difference (95% CI)   | F (df)       | p      |
| CSF A $\beta$ 42/40                | Intervention        | Sleep-deprived vs. Control | 0.018<br>(-0.020, 0.056)   | 1.263 (1,7)  | 0.298  |
|                                    | Time of day         |                            |                            | 0.440 (5,34) | 0.818  |
|                                    | Intervention x time |                            |                            | 0.933 (5,34) | 0.472  |
| Plasma A $\beta$ 42/40             | Intervention        | Sleep-deprived vs. Control | -0.008<br>(-0.011, -0.004) | 25.30 (1,44) | <0.001 |
|                                    | Time of day         |                            |                            | 0.30 (5,44)  | 0.911  |
|                                    | Intervention x time |                            |                            | 0.76 (5,44)  | 0.586  |
| CSF pT181/T181                     | Intervention        | Sleep-deprived vs. Control | +1.977<br>(-1.896, 5.850)  | 1.06 (1,44)  | 0.309  |
|                                    | Time of day         |                            |                            | 0.10 (5,44)  | 0.993  |
|                                    | Intervention x time |                            |                            | 0.02 (5,44)  | 1.0    |
| Plasma pT181/T181                  | Intervention        | Sleep-deprived vs. Control | +0.284<br>(-1.052, 1.621)  | 0.18 (1,43)  | 0.670  |
|                                    | Time of day         |                            |                            | 0.75 (5,43)  | 0.589  |
|                                    | Intervention x time |                            |                            | 0.51 (5,43)  | 0.770  |
| CSF pT181/ A $\beta$ 42            | Intervention        | Sleep-deprived vs. Control | +0.007<br>(-0.045, 0.058)  | 0.096 (1,8)  | 0.765  |
|                                    | Time of day         |                            |                            | 0.365 (5,39) | 0.869  |
|                                    | Intervention x time |                            |                            | 0.497 (5,39) | 0.777  |
| Plasma pT181/ A $\beta$ 42         | Intervention        | Sleep-deprived vs. Control | -0.019<br>(-0.718, 0.679)  | 0.004 (1,8)  | 0.951  |
|                                    | Time of day         |                            |                            | 1.243 (5,39) | 0.308  |
|                                    | Intervention x time |                            |                            | 0.812 (5,39) | 0.548  |

CSF = cerebrospinal fluid; A $\beta$  = amyloid- $\beta$ ; T181 = unphosphorylated tau-181; T217 = unphosphorylated tau-217; pT181 = phosphorylated tau-181; CI = confidence intervals; df = degrees of freedom
